# Supplementary material for: Parent-of-origin effects propagate through networks to shape metabolic traits
Source: eLife. 2022 Mar 31;11:e72989. doi: 10.7554/eLife.72989 (PMC9075957; doi:10.7554/eLife.72989)
Supplement: Supplementary file 8. [file elife-72989-supp8.xlsx]

## Sheet: STAR_summaries_ASEDE
Alignment	Barcode	alignment_rate	input_read_number	average_input_read_length	average_mapped_length	uniquely_mapped_reads_number	uniquely_mapped_read_percent	multi_loci_mapped_reads_number	multi_loci_mapped_read_percent	too_many_loci_mapped_reads_number	too_many_loci_mapped_read_percent	unmapped_reads_percent_too_many_mismatch	unmapped_reads_percent_too_short	number_splices_total	mismatch_rate_per_base	deletion_rate_per_base	deletion_average_length	insertion_rate_per_base	insertion_average_length	unmapped_reads_percent_other	chimeric_reads_number	chimeric_reads_percent
ASE	ACCCACT	12.2062	16980951	202	200.05	2072726	0.1221	0	0	12988317	0.7649	0	0.1113	823690	0.0046	0.0002	2.45	0.0001	1.8	0.0018	0	0
ASE	ACGTCTG	10.9957	14742752	202	199.65	1621066	0.11	0	0	10872824	0.7375	0	0.1502	482353	0.005	0.0003	2.59	0.0001	1.88	0.0023	0	0
ASE	AGATACT	11.5629	13820029	202	200.24	1597994	0.1156	0	0	10796954	0.7813	0	0.101	627349	0.0046	0.0002	2.5	0.0001	1.86	0.0021	0	0
ASE	ATGACAG	11.6692	26245544	202	200.01	3062641	0.1167	0	0	19840107	0.7559	0	0.125	1077024	0.0046	0.0003	2.56	0.0001	1.79	0.0023	0	0
ASE	CAAGCCG	11.3894	17034032	202	200.04	1940082	0.1139	0	0	12904237	0.7576	0	0.1268	820834	0.0046	0.0002	2.53	0.0001	1.85	0.0018	0	0
ASE	CAATATC	11.7397	17330422	202	200.15	2034541	0.1174	0	0	12994286	0.7498	0	0.1311	831746	0.0046	0.0002	2.43	0.0001	1.82	0.0017	0	0
ASE	CACCTCC	11.743	23419683	202	200.21	2750181	0.1174	0	0	18012650	0.7691	0	0.1117	1009572	0.0044	0.0003	2.51	0.0001	1.75	0.0017	0	0
ASE	CCCCCCG	10.3365	10954713	202	199.81	1132331	0.1034	0	0	8362446	0.7634	0	0.1319	534480	0.0048	0.0001	2.63	0.0001	1.86	0.0013	0	0
ASE	CCGGACC	11.235	6081319	202	199.63	683239	0.1124	0	0	4658405	0.766	0	0.1201	301020	0.0049	0.0002	2.4	0.0001	1.88	0.0015	0	0
ASE	CCTAATC	12.3402	17715687	202	200.04	2186157	0.1234	0	0	13640198	0.77	0	0.105	915206	0.0048	0.0002	2.49	0.0001	1.81	0.0016	0	0
ASE	CGGTGGC	12.0567	17451622	202	199.84	2104082	0.1206	0	0	12887205	0.7385	0	0.1385	646775	0.005	0.0003	2.61	0.0001	1.79	0.0024	0	0
ASE	CGTCGCT	11.5124	20191026	202	199.88	2324480	0.1151	0	0	15137471	0.7497	0	0.1332	853480	0.0049	0.0002	2.55	0.0001	1.88	0.002	0	0
ASE	CTCCCGA	11.5876	24655914	202	199.95	2857031	0.1159	0	0	19113434	0.7752	0	0.1073	1197742	0.0048	0.0002	2.41	0.0001	1.82	0.0016	0	0
ASE	GAGGCGT	11.3979	18077143	202	199.96	2060423	0.114	0	0	13479504	0.7457	0	0.1382	720131	0.0049	0.0002	2.55	0.0001	1.83	0.0022	0	0
ASE	GCAACGC	11.2526	15851187	202	199.89	1783675	0.1125	0	0	12370129	0.7804	0	0.1056	782523	0.0049	0.0002	2.39	0.0001	1.82	0.0015	0	0
ASE	GCAGGGG	11.9394	19973388	202	200.28	2384695	0.1194	0	0	15562691	0.7792	0	0.0996	976790	0.0047	0.0002	2.45	0.0001	1.88	0.0018	0	0
ASE	GCCGTTT	12.2245	19178856	202	199.93	2344524	0.1222	0	0	14589788	0.7607	0	0.1145	848016	0.0047	0.0002	2.45	0.0001	1.81	0.0026	0	0
ASE	GCTTAGA	11.217	17965775	202	200.17	2015225	0.1122	0	0	13939485	0.7759	0	0.1101	826571	0.005	0.0002	2.46	0.0001	1.81	0.0018	0	0
ASE	GGGTCAA	12.3664	22091753	202	200.28	2731947	0.1237	0	0	17087767	0.7735	0	0.1004	907267	0.0044	0.0002	2.5	0.0001	1.87	0.0024	0	0
ASE	GGTCCTC	11.8034	23136174	202	200.07	2730846	0.118	0	0	17842842	0.7712	0	0.1084	991868	0.0046	0.0002	2.5	0.0001	1.86	0.0023	0	0
ASE	GTACGGC	12.5784	18557364	202	199.99	2334225	0.1258	0	0	14104481	0.76	0	0.1121	859377	0.005	0.0002	2.54	0.0001	1.81	0.002	0	0
ASE	GTCGATA	11.5307	22460056	202	200.26	2589807	0.1153	0	0	17272382	0.769	0	0.1137	1042221	0.0048	0.0002	2.53	0.0001	1.8	0.002	0	0
ASE	GTCTGAT	11.4437	20087452	202	200.04	2298743	0.1144	0	0	15331510	0.7632	0	0.1205	927790	0.0047	0.0002	2.45	0.0001	1.88	0.0018	0	0
ASE	TACAGAC	12.1207	16569279	202	200.2	2008317	0.1212	0	0	12694692	0.7662	0	0.1103	657327	0.0044	0.0003	2.53	0.0001	1.79	0.0024	0	0
ASE	TACATGG	12.4728	19595010	202	200.03	2444055	0.1247	0	0	15012050	0.7661	0	0.1072	929784	0.0047	0.0002	2.5	0.0001	1.84	0.002	0	0
ASE	TCAACTG	11.4101	33680739	202	200.17	3842993	0.1141	0	0	25949553	0.7705	0	0.1136	1481791	0.0047	0.0003	2.57	0.0001	1.76	0.0018	0	0
ASE	TCCCAGC	11.8099	28784777	202	200	3399461	0.1181	0	0	21520117	0.7476	0	0.1322	1152037	0.0049	0.0003	2.58	0.0001	1.78	0.0021	0	0
ASE	TGAGGTT	11.238	19055645	202	199.83	2141475	0.1124	0	0	14155636	0.7429	0	0.1427	716343	0.0052	0.0003	2.6	0.0001	1.81	0.0021	0	0
ASE	TGATTAC	11.2582	22078227	202	199.75	2485608	0.1126	0	0	16932350	0.7669	0	0.1185	914294	0.0051	0.0003	2.57	0.0001	1.76	0.002	0	0
ASE	TGTTTGT	11.3365	18979283	202	199.96	2151591	0.1134	0	0	14666367	0.7728	0	0.1125	975739	0.0049	0.0002	2.42	0.0001	1.84	0.0014	0	0
ASE	TTTAACT	12.4604	11190149	202	200.27	1394342	0.1246	0	0	8523874	0.7617	0	0.1109	410859	0.0043	0.0002	2.55	0.0001	1.82	0.0028	0	0
ASE	TTTTGTC	11.6199	17255327	202	200.05	2005049	0.1162	0	0	13153895	0.7623	0	0.1196	810941	0.0047	0.0002	2.48	0.0001	1.84	0.0019	0	0
DE	ACCCACT	88.3699	16980951	202	200.05	2072726	0.1221	12933322	0.7616	54995	0.0032	0	0.1113	823690	0.0046	0.0002	2.45	0.0001	1.8	0.0018	0	0
DE	ACGTCTG	84.4482	14742752	202	199.65	1621066	0.11	10828925	0.7345	43899	0.003	0	0.1502	482353	0.005	0.0003	2.59	0.0001	1.88	0.0023	0	0
DE	AGATACT	89.3553	13820029	202	200.24	1597994	0.1156	10750932	0.7779	46022	0.0033	0	0.101	627349	0.0046	0.0002	2.5	0.0001	1.86	0.0021	0	0
DE	ATGACAG	86.8928	26245544	202	200.01	3062641	0.1167	19742834	0.7522	97273	0.0037	0	0.125	1077024	0.0046	0.0003	2.56	0.0001	1.79	0.0023	0	0
DE	CAAGCCG	86.7808	17034032	202	200.04	1940082	0.1139	12842188	0.7539	62049	0.0036	0	0.1268	820834	0.0046	0.0002	2.53	0.0001	1.85	0.0018	0	0
DE	CAATATC	86.3976	17330422	202	200.15	2034541	0.1174	12938533	0.7466	55753	0.0032	0	0.1311	831746	0.0046	0.0002	2.43	0.0001	1.82	0.0017	0	0
DE	CACCTCC	88.3356	23419683	202	200.21	2750181	0.1174	17937728	0.7659	74922	0.0032	0	0.1117	1009572	0.0044	0.0003	2.51	0.0001	1.75	0.0017	0	0
DE	CCCCCCG	86.2792	10954713	202	199.81	1132331	0.1034	8319304	0.7594	43142	0.0039	0	0.1319	534480	0.0048	0.0001	2.63	0.0001	1.86	0.0013	0	0
DE	CCGGACC	87.5036	6081319	202	199.63	683239	0.1124	4638132	0.7627	20273	0.0033	0	0.1201	301020	0.0049	0.0002	2.4	0.0001	1.88	0.0015	0	0
DE	CCTAATC	89.0162	17715687	202	200.04	2186157	0.1234	13583668	0.7668	56530	0.0032	0	0.105	915206	0.0048	0.0002	2.49	0.0001	1.81	0.0016	0	0
DE	CGGTGGC	85.5972	17451622	202	199.84	2104082	0.1206	12834011	0.7354	53194	0.003	0	0.1385	646775	0.005	0.0003	2.61	0.0001	1.79	0.0024	0	0
DE	CGTCGCT	86.1496	20191026	202	199.88	2324480	0.1151	15070008	0.7464	67463	0.0033	0	0.1332	853480	0.0049	0.0002	2.55	0.0001	1.88	0.002	0	0
DE	CTCCCGA	88.7727	24655914	202	199.95	2857031	0.1159	19030678	0.7719	82756	0.0034	0	0.1073	1197742	0.0048	0.0002	2.41	0.0001	1.82	0.0016	0	0
DE	GAGGCGT	85.6592	18077143	202	199.96	2060423	0.114	13424305	0.7426	55199	0.0031	0	0.1382	720131	0.0049	0.0002	2.55	0.0001	1.83	0.0022	0	0
DE	GCAACGC	88.9677	15851187	202	199.89	1783675	0.1125	12318756	0.7772	51373	0.0032	0	0.1056	782523	0.0049	0.0002	2.39	0.0001	1.82	0.0015	0	0
DE	GCAGGGG	89.5372	19973388	202	200.28	2384695	0.1194	15498921	0.776	63770	0.0032	0	0.0996	976790	0.0047	0.0002	2.45	0.0001	1.88	0.0018	0	0
DE	GCCGTTT	87.7447	19178856	202	199.93	2344524	0.1222	14483906	0.7552	105882	0.0055	0	0.1145	848016	0.0047	0.0002	2.45	0.0001	1.81	0.0026	0	0
DE	GCTTAGA	88.4899	17965775	202	200.17	2015225	0.1122	13882665	0.7727	56820	0.0032	0	0.1101	826571	0.005	0.0002	2.46	0.0001	1.81	0.0018	0	0
DE	GGGTCAA	89.3444	22091753	202	200.28	2731947	0.1237	17005788	0.7698	81979	0.0037	0	0.1004	907267	0.0044	0.0002	2.5	0.0001	1.87	0.0024	0	0
DE	GGTCCTC	88.5986	23136174	202	200.07	2730846	0.118	17767475	0.768	75367	0.0033	0	0.1084	991868	0.0046	0.0002	2.5	0.0001	1.86	0.0023	0	0
DE	GTACGGC	88.2652	18557364	202	199.99	2334225	0.1258	14045475	0.7569	59006	0.0032	0	0.1121	859377	0.005	0.0002	2.54	0.0001	1.81	0.002	0	0
DE	GTCGATA	88.1105	22460056	202	200.26	2589807	0.1153	17199858	0.7658	72524	0.0032	0	0.1137	1042221	0.0048	0.0002	2.53	0.0001	1.8	0.002	0	0
DE	GTCTGAT	87.4479	20087452	202	200.04	2298743	0.1144	15267316	0.76	64194	0.0032	0	0.1205	927790	0.0047	0.0002	2.45	0.0001	1.88	0.0018	0	0
DE	TACAGAC	88.4113	16569279	202	200.2	2008317	0.1212	12640805	0.7629	53887	0.0033	0	0.1103	657327	0.0044	0.0003	2.53	0.0001	1.79	0.0024	0	0
DE	TACATGG	88.7556	19595010	202	200.03	2444055	0.1247	14947616	0.7628	64434	0.0033	0	0.1072	929784	0.0047	0.0002	2.5	0.0001	1.84	0.002	0	0
DE	TCAACTG	88.1645	33680739	202	200.17	3842993	0.1141	25851473	0.7675	98080	0.0029	0	0.1136	1481791	0.0047	0.0003	2.57	0.0001	1.76	0.0018	0	0
DE	TCCCAGC	86.26	28784777	202	200	3399461	0.1181	21430274	0.7445	89843	0.0031	0	0.1322	1152037	0.0049	0.0003	2.58	0.0001	1.78	0.0021	0	0
DE	TGAGGTT	85.2266	19055645	202	199.83	2141475	0.1124	14099002	0.7399	56634	0.003	0	0.1427	716343	0.0052	0.0003	2.6	0.0001	1.81	0.0021	0	0
DE	TGATTAC	87.647	22078227	202	199.75	2485608	0.1126	16865289	0.7639	67061	0.003	0	0.1185	914294	0.0051	0.0003	2.57	0.0001	1.76	0.002	0	0
DE	TGTTTGT	88.3026	18979283	202	199.96	2151591	0.1134	14607601	0.7697	58766	0.0031	0	0.1125	975739	0.0049	0.0002	2.42	0.0001	1.84	0.0014	0	0
DE	TTTAACT	88.3005	11190149	202	200.27	1394342	0.1246	8486616	0.7584	37258	0.0033	0	0.1109	410859	0.0043	0.0002	2.55	0.0001	1.82	0.0028	0	0
DE	TTTTGTC	87.5097	17255327	202	200.05	2005049	0.1162	13095037	0.7589	58858	0.0034	0	0.1196	810941	0.0047	0.0002	2.48	0.0001	1.84	0.0019	0	0
